# Supplementary material
Source: PubMed Central journal article supplement (PMC6327322)

## Anti-HIV Cyclotides from the Chinese Medicinal Herb *Viola yedoensis*

Conan K.L. Wang,<sup>†</sup> Michelle L. Colgrave,<sup>†</sup> Kirk R. Gustafson,<sup>‡</sup> David C. Ireland,<sup>†</sup> Ulf Goransson,<sup>§</sup> and David J. Craik<sup>\*,†</sup>

*Institute for Molecular Bioscience, Australian Research Council Special Research Centre for Functional and Applied Genomics, University of Queensland, Brisbane, Queensland, 4072, Australia, Molecular Targets Development Program, Center for Cancer Research, National Cancer Institute, Building 1052, Room 121, Frederick, MD 21702-1201, and*

*Division of Pharmacognosy, Department of Medicinal Chemistry, Uppsala University, Biomedical Centre, Box 574, 751 23 Uppsala, Sweden*

### Supporting Information

#### Table of Contents

|                                                                                                                                    | page |
|------------------------------------------------------------------------------------------------------------------------------------|------|
| <b>Table S1.</b> Sequence Fragments from the Enzymatic Digestion of Cyclotides from <i>V. yedoensis</i> .....                      | S2   |
| <b>Figure S1.</b> A MS/MS spectrum of a peptide fragment (S7-L18) from a chymotrypsin and endoGluC digest of cycloviolacin Y5..... | S3   |
| <b>Figure S2.</b> H $\alpha$ chemical shift comparisons for selected cyclotides.....                                               | S4   |

---

\* Author to whom correspondence should be addressed. Tel: 61-7-3346-2019. Fax: 61-7-3346-2029. E-mail: d.craik@imb.uq.edu.au.

<sup>†</sup> University of Queensland.

<sup>‡</sup> National Cancer Institute, Frederick, MD.

<sup>§</sup> Uppsala University.

**Table S1.** Sequence Fragments from the Enzymatic Digestion of Cyclotides from *V. yedoensis*.

| cyclotide                                 | peptide sequenced |   |     | enzyme(s) used <sup>a</sup> | relative abundance (%) <sup>b</sup> | theoretical mass (Da) | experimental mass (Da) | $\Delta m$ (Da) <sup>c</sup> |
|-------------------------------------------|-------------------|---|-----|-----------------------------|-------------------------------------|-----------------------|------------------------|------------------------------|
| cycloviolacin<br>Y1<br>(100) <sup>d</sup> | T10               | - | Y17 | CE                          | 65                                  | 906.37                | 906.48                 | 0.11                         |
|                                           | G31               | - | E9  | CE                          | 30                                  | 1169.48               | 1169.60                | 0.12                         |
|                                           | T18               | - | Y30 | CE                          | 56                                  | 1370.48               | 1370.64                | 0.16                         |
|                                           | L13               | - | Y26 | CE                          | 34                                  | 1437.48               | 1437.66                | 0.18                         |
|                                           | G31               | - | F12 | CE                          | 100                                 | 1520.60               | 1520.76                | 0.16                         |
|                                           | G27               | - | E9  | CE                          | 31                                  | 1640.64               | 1640.75                | 0.11                         |
|                                           | G27               | - | F12 | CE                          | 20                                  | 1991.76               | 1991.92                | 0.16                         |
|                                           | T10               | - | E9  | TE                          | 100                                 | 3411.29               | 3411.62                | 0.33                         |
| cycloviolacin<br>Y2<br>(100) <sup>d</sup> | S10               | - | Y17 | CE                          | 30                                  | 892.36                | 892.28                 | 0.08                         |
|                                           | G31               | - | E9  | CE                          | 76                                  | 1169.48               | 1169.40                | 0.08                         |
|                                           | G31               | - | F12 | CE                          | 28                                  | 1506.58               | 1506.50                | 0.08                         |
|                                           | G31               | - | Y17 | C                           | 30                                  | 2043.81               | 2043.96                | 0.15                         |
|                                           | T18               | - | Y30 | C                           | 75                                  | 1333.50               | 1333.58                | 0.08                         |
|                                           | S10               | - | E9  | TE                          | 100                                 | 3360.29               | 3360.11                | 0.18                         |
| cycloviolacin<br>Y3<br>(100) <sup>d</sup> | T10               | - | Y17 | CE                          | 30                                  | 906.37                | 906.30                 | 0.07                         |
|                                           | G31               | - | E9  | CE                          | 76                                  | 1169.48               | 1169.40                | 0.08                         |
|                                           | G31               | - | F12 | CE                          | 28                                  | 1520.60               | 1520.50                | 0.10                         |
|                                           | G31               | - | Y17 | C                           | 30                                  | 2043.81               | 2043.96                | 0.15                         |
|                                           | T18               | - | Y30 | C                           | 75                                  | 1333.50               | 1333.58                | 0.08                         |
| cycloviolacin<br>Y4<br>(100) <sup>d</sup> | S7                | - | E6  | TE                          | 76                                  | 3023.31               | 3023.61                | 0.30                         |
|                                           | S7                | - | Y28 | CE                          | 61                                  | 2253.97               | 2254.20                | 0.23                         |
|                                           | I11               | - | Y28 | CE                          | 76                                  | 1817.79               | 1817.98                | 0.19                         |
|                                           | I11               | - | E6  | CE                          | 20                                  | 2587.13               | 2587.40                | 0.27                         |
| cycloviolacin<br>Y5<br>(100) <sup>d</sup> | S7                | - | C13 | CE                          | 22                                  | 806.35                | 806.36                 | 0.01                         |
|                                           | T14               | - | Y29 | CE                          | 32                                  | 1647.74               | 1647.78                | 0.04                         |
|                                           | V19               | - | E6  | CE                          | 24                                  | 1846.75               | 1846.73                | 0.02                         |
|                                           | S7                | - | L18 | CE                          | 64                                  | 1291.64               | 1291.64                | 0.00                         |
|                                           | A17               | - | Y29 | CE                          | 82                                  | 1346.58               | 1346.56                | 0.02                         |
|                                           | I11               | - | L18 | C                           | 34                                  | 816.45                | 816.48                 | 0.03                         |
|                                           | V19               | - | Y29 | C                           | 10                                  | 1162.46               | 1162.46                | 0.00                         |
|                                           | N30               | - | W10 | C                           | 23                                  | 1177.50               | 1177.50                | 0.00                         |
|                                           | I11               | - | Y29 | C                           | 27                                  | 1960.89               | 1960.62                | 0.27                         |
|                                           | V19               | - | W10 | C                           | 21                                  | 2321.93               | 2322.02                | 0.09                         |
|                                           | A17               | - | W10 | C                           | 15                                  | 2506.06               | 2506.01                | 0.05                         |

<sup>a</sup>Enzymes used included trypsin (T), chymotrypsin (C), and endoGluC (E)

<sup>b</sup>The abundance relative to the most intense ion recorded in the TOF scan in the range 400-2000 Da

<sup>c</sup>The absolute difference between the theoretical and experimental mass

<sup>d</sup>Percentage (%) sequence coverage

**Figure S1.** A MS/MS spectrum of a peptide fragment (S7-L18) from a chymotrypsin and endoGluC digest of cycloviolacin Y5. The b- and y- ions, which are the main ions observed in a MS/MS spectrum, have been labelled.

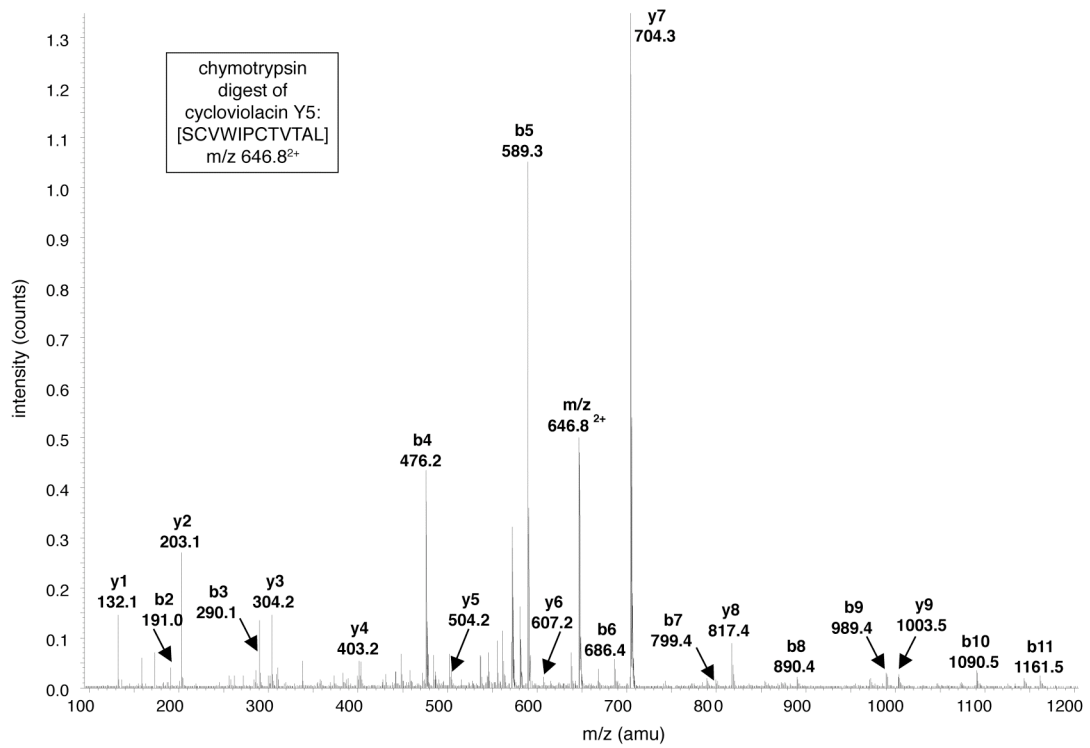

**Figure S2.** H $\alpha$  chemical shift comparisons for selected cyclotides. Panel (A) shows the comparison of H $\alpha$  chemical shifts between cycloviolacin Y1 and tricyclon A. Panel (B) shows the comparison of H $\alpha$  chemical shifts between cycloviolacin Y5 and cycloviolacin O1.

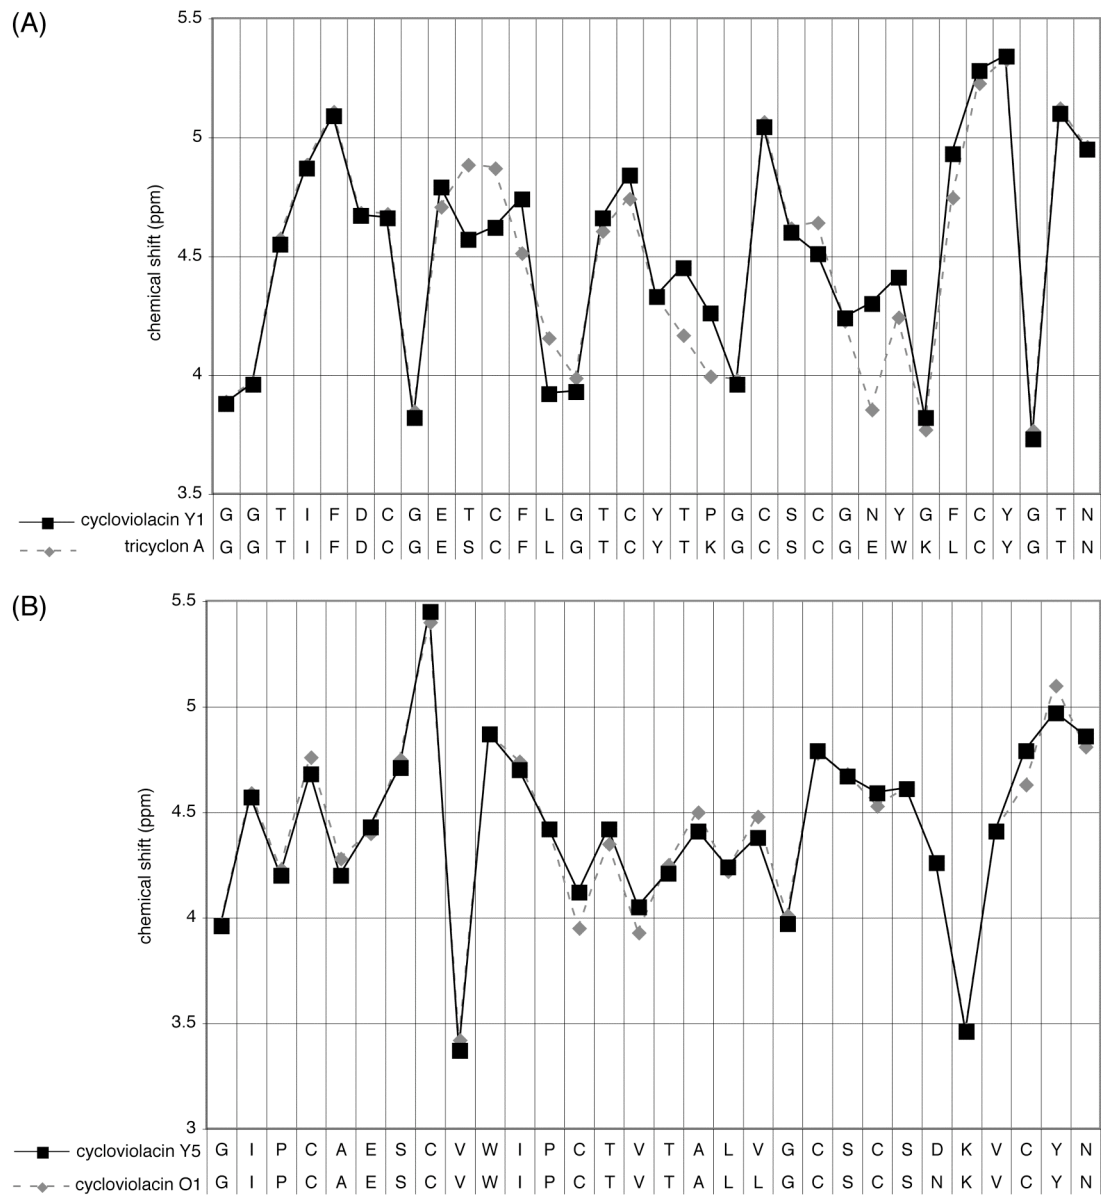

Supplement: NIHMS999974-supplement-supplemental.pdf [file NIHMS999974-supplement-supplemental.pdf]
